# Supplementary material for: Prebiotic Potential of a New Sweetener Based on Galactooligosaccharides and Modified Mogrosides
Source: PubMed Central journal article supplement (PMC9335866; doi:10.1021/acs.jafc.2c01363), 2022-07-13
Supplement: jf2c01363_si_001.pdf [file jf2c01363_si_001.pdf]

## SUPPLEMENTARY MATERIAL

### Prebiotic potential of a new sweetener based on galactooligosaccharides and modified mogrosides -jf-2022-01363m.R1

Ana Muñoz-Labrador<sup>a</sup>, Rosa Lebrón-Aguilar<sup>b</sup>, Jesús E. Quintanilla-López<sup>b</sup>, Plácido Galindo-Iranzo<sup>b</sup>, Silvana M. Azcarate<sup>c</sup>, Sofia Kolida<sup>d</sup>, Vasiliki Kachrimanidou<sup>e</sup>, Virginia Garcia-Cañas<sup>a</sup>, Lisa Methven<sup>e</sup>, Robert A. Rastall<sup>e</sup>, F. Javier Moreno<sup>\*a</sup> and Oswaldo Hernandez-Hernandez<sup>a</sup>

<sup>a</sup>Institute of Food Science Research, CIAL (CSIC-UAM), Nicolas Cabrera, 9, 28049 Madrid, Spain

<sup>b</sup>Institute of Physical Chemistry 'Rocasolano' (IQFR-CSIC), Serrano 119, 28006 Madrid, Spain

<sup>c</sup>Institute of Earth and Environmental Sciences of La Pampa (INCITAP), Mendoza 109, L6302EPA Santa Rosa, La Pampa, Argentina

<sup>d</sup>OptiBiotix Health plc, Innovation Centre, Innovation Way, Heslington, York, YO10 5DG, UK

<sup>e</sup>Department of Food and Nutritional Sciences, The University of Reading, PO Box 226, Whiteknights, Reading RG6 6 AP, UK

\*Correspondence email and telephone: [javier.moreno@csic.es](mailto:javier.moreno@csic.es) ; +34 910017948

## Table of Contents

**Table S1.** Results of quantitative real-time PCR after *in vitro* fermentation at 0 and 10 h corresponding to **Figure 2A**.

**Table S2.** Results of quantitative real-time PCR after *in vitro* fermentation at 0 and 24 h corresponding to **Figure 2B**.

**Full set of statistical data.**

**Table S1.** Results of quantitative real-time PCR after *in vitro* fermentation at 0 and 10 h corresponding to **Figure 2A**.

| Samples 10 h     |                | All bacteria    | Atopobium       | Bacteroides     | Bifidobacterium  | Coccoides        | Enterobacteria  | Enterococcus    | Lactobacillus    |
|------------------|----------------|-----------------|-----------------|-----------------|------------------|------------------|-----------------|-----------------|------------------|
| 0 hours          | Mean           | 9.278           | 5.060           | 7.849           | 8.960            | 7.987            | 4.863           | 6.606           | 7.404            |
|                  | N              | 16              | 16              | 12              | 12               | 8                | 12              | 12              | 12               |
|                  | Std. Deviation | 0.230           | 0.297           | 0.465           | 0.303            | 0.264            | 0.347           | 0.418           | 0.393            |
| Negative Control | Mean           | 9.012 <b>a*</b> | 7.851 <b>ab</b> | 7.836 <b>a*</b> | 7.937 <b>a</b>   | 5.809 <b>b*</b>  | 7.996 <b>a</b>  | 7.519 <b>ab</b> | 4.964 <b>ab</b>  |
|                  | N              | 12              | 12              | 12              | 8                | 12               | 12              | 9               | 12               |
|                  | Std. Deviation | 0.106           | 0.273           | 1.110           | 0.272            | 0.078            | 0.522           | 0.369           | 0.650            |
| GOS Control      | Mean           | 9.354 <b>b</b>  | 8.458 <b>c</b>  | 9.533 <b>b</b>  | 9.186 <b>c</b>   | 5.982 <b>bc*</b> | 8.153 <b>a</b>  | 7.952 <b>bc</b> | 6.714 <b>ab*</b> |
|                  | N              | 12              | 12              | 12              | 12               | 12               | 12              | 12              | 12               |
|                  | Std. Deviation | 0.140           | 0.442           | 0.289           | 0.317            | 0.111            | 0.666           | 0.375           | 1.105            |
| MV Control       | Mean           | 8.841 <b>a*</b> | 7.526 <b>a</b>  | 8.053 <b>a*</b> | 7.838 <b>a</b>   | 5.527 <b>a</b>   | 7.707 <b>a</b>  | 7.323 <b>a</b>  | 4.851 <b>a*</b>  |
|                  | N              | 12              | 12              | 12              | 12               | 12               | 10              | 12              | 12               |
|                  | Std. Deviation | 0.408           | 0.522           | 1.184           | 0.377            | 0.330            | 0.511           | 0.621           | 1.117            |
| mMV-GOS          | Mean           | 9.389 <b>b</b>  | 8.226 <b>bc</b> | 9.733 <b>b</b>  | 8.494 <b>b</b>   | 6.146 <b>c*</b>  | 8.236 <b>a</b>  | 8.165 <b>c</b>  | 6.407 <b>b*</b>  |
|                  | N              | 12              | 12              | 12              | 12               | 12               | 12              | 12              | 12               |
|                  | Std. Deviation | 0.237           | 0.415           | 0.315           | 0.437            | 0.107            | 0.487           | 0.416           | 0.811            |
| Positive Control | Mean           | 9.322 <b>b</b>  | 8.380 <b>c</b>  | 9.625 <b>b</b>  | 8.911 <b>bc*</b> | 5.965 <b>bc</b>  | 8.175 <b>a*</b> | 7.948 <b>bc</b> | 5.738 <b>ab*</b> |
|                  | N              | 12              | 12              | 12              | 20               | 11               | 12              | 12              | 12               |
|                  | Std. Deviation | 0.162           | 0.505           | 0.235           | 0.544            | 0.335            | 0.864           | 0.267           | 1.746            |

Different letters indicate statistically significant difference between samples at  $p \leq 0.05$  by Tukey's test in the same column  
 Statistical differences respect to 0 hours sample are indicated by asterisk (\*) in the same column

**Table S2.** Results of quantitative real-time PCR after *in vitro* fermentation at 0 and 24 h corresponding to **Figure 2B**.

| Samples 24 h     |                | All bacteria | Atopobium | Bacteroides | Bifidobacterium | Coccoides | Enterobacteria | Enterococcus | Lactobacillus |
|------------------|----------------|--------------|-----------|-------------|-----------------|-----------|----------------|--------------|---------------|
| 0 hours          | Mean           | 9.278        | 5.060     | 7.849       | 8.960           | 7.987     | 4.863          | 6.606        | 7.404         |
|                  | N              | 16           | 16        | 12          | 12              | 8         | 12             | 12           | 12            |
|                  | Std. Deviation | 0.230        | 0.297     | 0.465       | 0.303           | 0.264     | 0.347          | 0.418        | 0.393         |
| Negative Control | Mean           | 9.196a       | 8.002ab   | 8.465ab     | 7.965ab         | 4.789b    | 7.669a         | 7.648b       | 5.281ab       |
|                  | N              | 16           | 12        | 12          | 8               | 12        | 12             | 12           | 16            |
|                  | Std. Deviation | 0.149        | 0.157     | 0.414       | 0.211           | 0.142     | 0.556          | 0.181        | 0.724         |
| GOS Control      | Mean           | 9.523b       | 8.483b    | 9.054bc     | 8.164b          | 5.362c    | 8.018a         | 7.936bc      | 6.163bc*      |
|                  | N              | 14           | 12        | 12          | 8               | 12        | 12             | 12           | 15            |
|                  | Std. Deviation | 0.217        | 0.547     | 0.410       | 0.418           | 0.429     | 0.808          | 0.365        | 1.774         |
| MV Control       | Mean           | 9.028a       | 7.573a*   | 7.826a*     | 7.370a*         | 4.195a*   | 7.566a         | 6.947a*      | 4.821a*       |
|                  | N              | 16           | 12        | 12          | 8               | 12        | 10             | 12           | 16            |
|                  | Std. Deviation | 0.285        | 0.958     | 1.052       | 0.737           | 0.886     | 0.705          | 0.885        | 1.322         |
| mMV-GOS          | Mean           | 9.576b*      | 8.582b    | 9.333c      | 8.379b          | 5.441c*   | 8.030a         | 8.325c       | 6.684c*       |
|                  | N              | 16           | 12        | 12          | 8               | 12        | 12             | 12           | 16            |
|                  | Std. Deviation | 0.103        | 0.279     | 0.265       | 0.129           | 0.155     | 0.550          | 0.339        | 1.105         |
| Positive Control | Mean           | 9.489b       | 8.557b    | 8.959bc     | 8.365b          | 5.135bc   | 8.006a*        | 8.011bc*     | 5.971abc*     |
|                  | N              | 16           | 12        | 12          | 8               | 12        | 12             | 12           | 16            |
|                  | Std. Deviation | 0.186        | 0.880     | 0.359       | 0.301           | 0.182     | 1.037          | 0.157        | 1.553         |

Different letters indicate statistically significant difference between samples at  $p \leq 0.05$  by Tukey's test in the same column  
 Statistical differences respect to 0 hours sample are indicated by asterisk (\*) in the same column

# Statistical Data

## 1. T TEST

0 hours - Negative Control 10 h

Independent Samples Test

|                          |                             | Levene's Test for Equality of Variances |      | t-test for Equality of Means |        |                 |                 |                       |                                           |         |
|--------------------------|-----------------------------|-----------------------------------------|------|------------------------------|--------|-----------------|-----------------|-----------------------|-------------------------------------------|---------|
|                          |                             | F                                       | Sig. | t                            | df     | Sig. (2-tailed) | Mean Difference | Std. Error Difference | 95% Confidence Interval of the Difference |         |
|                          |                             |                                         |      |                              |        |                 |                 |                       | Lower                                     | Upper   |
| All bacteria (CFU/mL)    | Equal variances assumed     | 5,758                                   | ,024 | 3,703                        | 26     | ,001            | ,26599          | ,07183                | ,11833                                    | ,41364  |
|                          | Equal variances not assumed |                                         |      | 4,079                        | 22,223 | ,000            | ,26599          | ,06522                | ,13082                                    | ,40116  |
| Atopobium (CFU/mL)       | Equal variances assumed     | 3,952                                   | ,059 | -,017                        | 22     | ,987            | -,00259         | ,15578                | -,32565                                   | ,32047  |
|                          | Equal variances not assumed |                                         |      | -,017                        | 17,774 | ,987            | -,00259         | ,15578                | -,33016                                   | ,32498  |
| Bacteroides (CFU/mL)     | Equal variances assumed     | 10,356                                  | ,004 | 3,385                        | 22     | ,003            | 1,12400         | ,33206                | ,43535                                    | 1,81265 |
|                          | Equal variances not assumed |                                         |      | 3,385                        | 12,634 | ,005            | 1,12400         | ,33206                | ,40451                                    | 1,84349 |
| Bifidobacterium (CFU/mL) | Equal variances assumed     | ,003                                    | ,957 | ,371                         | 14     | ,716            | ,04970          | ,13405                | -,23781                                   | ,33720  |
|                          | Equal variances not assumed |                                         |      | ,371                         | 13,988 | ,716            | ,04970          | ,13405                | -,23784                                   | ,33723  |
| Cocoides (CFU/mL)        | Equal variances assumed     | 15,676                                  | ,001 | -9,205                       | 22     | ,000            | -,94548         | ,10272                | -1,15851                                  | -,73245 |
|                          | Equal variances not assumed |                                         |      | -9,205                       | 12,104 | ,000            | -,94548         | ,10272                | -1,16907                                  | -,72189 |
| Enterobacteria (CFU/mL)  | Equal variances assumed     | ,775                                    | ,388 | -7,198                       | 22     | ,000            | -1,39013        | ,19312                | -1,79064                                  | -,98963 |
|                          | Equal variances not assumed |                                         |      | -7,198                       | 21,008 | ,000            | -1,39013        | ,19312                | -1,79174                                  | -,98853 |
| Enterococcus (CFU/mL)    | Equal variances assumed     | ,160                                    | ,693 | -,683                        | 19     | ,503            | -,11535         | ,16882                | -,46869                                   | ,23800  |
|                          | Equal variances not assumed |                                         |      | -,690                        | 17,956 | ,499            | -,11535         | ,16722                | -,46672                                   | ,23603  |
| Lactobacillus (CFU/mL)   | Equal variances assumed     | ,842                                    | ,367 | -,034                        | 26     | ,973            | -,00416         | ,12107                | -,25301                                   | ,24470  |
|                          | Equal variances not assumed |                                         |      | -,034                        | 21,839 | ,973            | -,00416         | ,12361                | -,26062                                   | ,25231  |

Independent Samples Test

|              |                             | Levene's Test for Equality of Variances |      | t-test for Equality of Means |       |                 |                 |                       |                                           |          |
|--------------|-----------------------------|-----------------------------------------|------|------------------------------|-------|-----------------|-----------------|-----------------------|-------------------------------------------|----------|
|              |                             | F                                       | Sig. | t                            | df    | Sig. (2-tailed) | Mean Difference | Std. Error Difference | 95% Confidence Interval of the Difference |          |
|              |                             |                                         |      |                              |       |                 |                 |                       | Lower                                     | Upper    |
| Acetate (mM) | Equal variances assumed     | 23,849                                  | ,000 | -10,629                      | 14    | ,000            | -7,42188        | ,69827                | -8,91952                                  | -5,92424 |
|              | Equal variances not assumed |                                         |      | -10,629                      | 7,026 | ,000            | -7,42188        | ,69827                | -9,07180                                  | -5,77196 |

|                 |                             |         |      |         |        |      |          |        |          |          |
|-----------------|-----------------------------|---------|------|---------|--------|------|----------|--------|----------|----------|
| Lactate (mM)    | Equal variances assumed     | ,468    | ,505 | 2,567   | 14     | ,022 | ,08480   | ,03303 | ,01396   | ,15565   |
|                 | Equal variances not assumed |         |      | 2,567   | 12,864 | ,024 | ,08480   | ,03303 | ,01336   | ,15624   |
| Butyrate (mM)   | Equal variances assumed     | 295,915 | ,000 | -8,446  | 14     | ,000 | -1,25111 | ,14812 | -1,56880 | -,93341  |
|                 | Equal variances not assumed |         |      | -8,446  | 7,087  | ,000 | -1,25111 | ,14812 | -1,60050 | -,90171  |
| Propionate (mM) | Equal variances assumed     | 4,567   | ,051 | -19,112 | 14     | ,000 | -1,70989 | ,08947 | -1,90178 | -1,51800 |
|                 | Equal variances not assumed |         |      | -19,112 | 8,160  | ,000 | -1,70989 | ,08947 | -1,91551 | -1,50427 |

0 hours - mMV-GOS 10 h

Independent Samples Test

|                          |                             | Levene's Test for Equality of Variances |      | t-test for Equality of Means |        |                 |                 |                       |                                           |          |
|--------------------------|-----------------------------|-----------------------------------------|------|------------------------------|--------|-----------------|-----------------|-----------------------|-------------------------------------------|----------|
|                          |                             | F                                       | Sig. | t                            | df     | Sig. (2-tailed) | Mean Difference | Std. Error Difference | 95% Confidence Interval of the Difference |          |
|                          |                             |                                         |      |                              |        |                 |                 |                       | Lower                                     | Upper    |
| All bacteria (CFU/mL)    | Equal variances assumed     | ,003                                    | ,954 | -1,246                       | 26     | ,224            | -,11098         | ,08906                | -,29404                                   | ,07208   |
|                          | Equal variances not assumed |                                         |      | -1,241                       | 23,484 | ,227            | -,11098         | ,08942                | -,29575                                   | ,07379   |
| Atopobium (CFU/mL)       | Equal variances assumed     | ,305                                    | ,587 | -2,099                       | 22     | ,048            | -,37774         | ,17997                | -,75098                                   | -,00450  |
|                          | Equal variances not assumed |                                         |      | -2,099                       | 21,715 | ,048            | -,37774         | ,17997                | -,75126                                   | -,00422  |
| Bacteroides (CFU/mL)     | Equal variances assumed     | ,010                                    | ,920 | -6,135                       | 22     | ,000            | -,77372         | ,12612                | -1,03529                                  | -,51216  |
|                          | Equal variances not assumed |                                         |      | -6,135                       | 21,971 | ,000            | -,77372         | ,12612                | -1,03531                                  | -,51214  |
| Bifidobacterium (CFU/mL) | Equal variances assumed     | 1,647                                   | ,216 | -2,928                       | 18     | ,009            | -,50721         | ,17322                | -,87113                                   | -,14330  |
|                          | Equal variances not assumed |                                         |      | -3,230                       | 17,906 | ,005            | -,50721         | ,15703                | -,83724                                   | -,17718  |
| Coccolides (CFU/mL)      | Equal variances assumed     | 11,423                                  | ,003 | -12,229                      | 22     | ,000            | -1,28294        | ,10491                | -1,50051                                  | -1,06536 |
|                          | Equal variances not assumed |                                         |      | -12,229                      | 13,085 | ,000            | -1,28294        | ,10491                | -1,50943                                  | -1,05644 |
| Enterobacteria (CFU/mL)  | Equal variances assumed     | ,450                                    | ,510 | -8,788                       | 22     | ,000            | -1,62968        | ,18545                | -2,01428                                  | -1,24508 |
|                          | Equal variances not assumed |                                         |      | -8,788                       | 21,508 | ,000            | -1,62968        | ,18545                | -2,01479                                  | -1,24457 |
| Enterococcus (CFU/mL)    | Equal variances assumed     | ,000                                    | ,991 | -4,606                       | 22     | ,000            | -,76104         | ,16523                | -1,10371                                  | -,41837  |
|                          | Equal variances not assumed |                                         |      | -4,606                       | 21,926 | ,000            | -,76104         | ,16523                | -1,10377                                  | -,41831  |
| Lactobacillus (CFU/mL)   | Equal variances assumed     | 13,591                                  | ,001 | -6,148                       | 26     | ,000            | -1,34697        | ,21910                | -1,79733                                  | -,89660  |
|                          | Equal variances not assumed |                                         |      | -5,484                       | 13,229 | ,000            | -1,34697        | ,24560                | -1,87663                                  | -,81731  |

Independent Samples Test

|  | Levene's Test for Equality of Variances | t-test for Equality of Means |
|--|-----------------------------------------|------------------------------|
|--|-----------------------------------------|------------------------------|

|                 |                             | F      | Sig. | t       | df    | Sig. (2-tailed) | Mean Difference | Std. Error Difference | 95% Confidence Interval of the Difference |           |
|-----------------|-----------------------------|--------|------|---------|-------|-----------------|-----------------|-----------------------|-------------------------------------------|-----------|
|                 |                             |        |      |         |       |                 |                 |                       | Lower                                     | Upper     |
| Acetate (mM)    | Equal variances assumed     | 20,300 | ,001 | -21,971 | 12    | ,000            | -19,59031       | ,89163                | -21,53300                                 | -17,64761 |
|                 | Equal variances not assumed |        |      | -18,768 | 5,008 | ,000            | -19,59031       | 1,04380               | -22,27215                                 | -16,90846 |
| Lactate (mM)    | Equal variances assumed     | 26,981 | ,000 | -11,576 | 12    | ,000            | -3,23991        | ,27988                | -3,84972                                  | -2,63010  |
|                 | Equal variances not assumed |        |      | -9,913  | 5,067 | ,000            | -3,23991        | ,32683                | -4,07672                                  | -2,40309  |
| Butyrate (mM)   | Equal variances assumed     | 23,351 | ,000 | -9,096  | 12    | ,000            | -2,31962        | ,25502                | -2,87525                                  | -1,76398  |
|                 | Equal variances not assumed |        |      | -7,772  | 5,015 | ,001            | -2,31962        | ,29845                | -3,08611                                  | -1,55312  |
| Propionate (mM) | Equal variances assumed     | 24,345 | ,000 | -18,619 | 12    | ,000            | -9,33431        | ,50134                | -10,42663                                 | -8,24199  |
|                 | Equal variances not assumed |        |      | -15,911 | 5,018 | ,000            | -9,33431        | ,58665                | -10,84073                                 | -7,82789  |

**0 hours - Positive Control 10 h**

**Independent Samples Test**

|                          |                             | Levene's Test for Equality of Variances |      | t-test for Equality of Means |        |                 |                 |                       |                                           |         |
|--------------------------|-----------------------------|-----------------------------------------|------|------------------------------|--------|-----------------|-----------------|-----------------------|-------------------------------------------|---------|
|                          |                             | F                                       | Sig. | t                            | df     | Sig. (2-tailed) | Mean Difference | Std. Error Difference | 95% Confidence Interval of the Difference |         |
|                          |                             |                                         |      |                              |        |                 |                 |                       | Lower                                     | Upper   |
| All bacteria (CFU/mL)    | Equal variances assumed     | ,980                                    | ,331 | -,574                        | 26     | ,571            | -,04483         | ,07808                | -,20533                                   | ,11567  |
|                          | Equal variances not assumed |                                         |      | -,603                        | 25,935 | ,551            | -,04483         | ,07429                | -,19754                                   | ,10789  |
| Atopobium (CFU/mL)       | Equal variances assumed     | ,023                                    | ,881 | -2,677                       | 22     | ,014            | -,53101         | ,19835                | -,94235                                   | -,11966 |
|                          | Equal variances not assumed |                                         |      | -2,677                       | 21,852 | ,014            | -,53101         | ,19835                | -,94252                                   | -,11950 |
| Bacteroides (CFU/mL)     | Equal variances assumed     | ,957                                    | ,339 | -6,008                       | 22     | ,000            | -,66565         | ,11079                | -,89542                                   | -,43588 |
|                          | Equal variances not assumed |                                         |      | -6,008                       | 20,717 | ,000            | -,66565         | ,11079                | -,89624                                   | -,43505 |
| Bifidobacterium (CFU/mL) | Equal variances assumed     | 5,502                                   | ,027 | -4,559                       | 26     | ,000            | -,92380         | ,20264                | -1,34034                                  | -,50726 |
|                          | Equal variances not assumed |                                         |      | -6,028                       | 24,697 | ,000            | -,92380         | ,15326                | -1,23964                                  | -,60796 |
| Coccioides (CFU/mL)      | Equal variances assumed     | ,000                                    | ,996 | -7,729                       | 21     | ,000            | -1,10132        | ,14249                | -1,39764                                  | -,80501 |
|                          | Equal variances not assumed |                                         |      | -7,742                       | 20,937 | ,000            | -1,10132        | ,14225                | -1,39721                                  | -,80544 |
| Enterobacteria (CFU/mL)  | Equal variances assumed     | 6,284                                   | ,020 | -5,660                       | 22     | ,000            | -1,56863        | ,27714                | -2,14338                                  | -,99387 |
|                          | Equal variances not assumed |                                         |      | -5,660                       | 15,892 | ,000            | -1,56863        | ,27714                | -2,15647                                  | -,98079 |
| Enterococcus (CFU/mL)    | Equal variances assumed     | 2,752                                   | ,111 | -3,963                       | 22     | ,001            | -,54348         | ,13714                | -,82789                                   | -,25907 |
|                          | Equal variances not assumed |                                         |      | -3,963                       | 19,382 | ,001            | -,54348         | ,13714                | -,83014                                   | -,25683 |
| Lactobacillus (CFU/mL)   | Equal variances assumed     | 26,007                                  | ,000 | -1,533                       | 26     | ,137            | -,67821         | ,44226                | -1,58729                                  | ,23088  |
|                          | Equal variances not assumed |                                         |      | -1,331                       | 11,479 | ,209            | -,67821         | ,50958                | -1,79409                                  | ,43768  |

**Independent Samples Test**

|                 |                             | Levene's Test for Equality of Variances |      | t-test for Equality of Means |       |                 |                 |                       |                                           |           |
|-----------------|-----------------------------|-----------------------------------------|------|------------------------------|-------|-----------------|-----------------|-----------------------|-------------------------------------------|-----------|
|                 |                             | F                                       | Sig. | t                            | df    | Sig. (2-tailed) | Mean Difference | Std. Error Difference | 95% Confidence Interval of the Difference |           |
|                 |                             |                                         |      |                              |       |                 |                 |                       | Lower                                     | Upper     |
| Acetate (mM)    | Equal variances assumed     | 8,710                                   | ,011 | -10,791                      | 13    | ,000            | -46,01667       | 4,26437               | -55,22928                                 | -36,80406 |
|                 | Equal variances not assumed |                                         |      | -10,038                      | 6,001 | ,000            | -46,01667       | 4,58402               | -57,23314                                 | -34,80020 |
| Lactate (mM)    | Equal variances assumed     | 16,360                                  | ,001 | -7,687                       | 14    | ,000            | -20,78798       | 2,70435               | -26,58823                                 | -14,98774 |
|                 | Equal variances not assumed |                                         |      | -7,687                       | 7,001 | ,000            | -20,78798       | 2,70435               | -27,18250                                 | -14,39347 |
| Butyrate (mM)   | Equal variances assumed     | 16,569                                  | ,002 | -4,061                       | 12    | ,002            | -1,74340        | ,42934                | -2,67885                                  | -,80794   |
|                 | Equal variances not assumed |                                         |      | -3,468                       | 5,005 | ,018            | -1,74340        | ,50268                | -3,03516                                  | -,45164   |
| Propionate (mM) | Equal variances assumed     | 50,642                                  | ,000 | -9,530                       | 12    | ,000            | -6,35337        | ,66667                | -7,80592                                  | -4,90082  |
|                 | Equal variances not assumed |                                         |      | -8,141                       | 5,010 | ,000            | -6,35337        | ,78038                | -8,35819                                  | -4,34855  |

**0 hours - GOS Control 10 h**

**Independent Samples Test**

|                          |                             | Levene's Test for Equality of Variances |      | t-test for Equality of Means |        |                 |                 |                       |                                           |          |
|--------------------------|-----------------------------|-----------------------------------------|------|------------------------------|--------|-----------------|-----------------|-----------------------|-------------------------------------------|----------|
|                          |                             | F                                       | Sig. | t                            | df     | Sig. (2-tailed) | Mean Difference | Std. Error Difference | 95% Confidence Interval of the Difference |          |
|                          |                             |                                         |      |                              |        |                 |                 |                       | Lower                                     | Upper    |
| All bacteria (CFU/mL)    | Equal variances assumed     | 2,871                                   | ,102 | -1,012                       | 26     | ,321            | -,07625         | ,07534                | -,23110                                   | ,07861   |
|                          | Equal variances not assumed |                                         |      | -1,084                       | 25,095 | ,289            | -,07625         | ,07035                | -,22111                                   | ,06862   |
| Atopobium (CFU/mL)       | Equal variances assumed     | ,115                                    | ,738 | -3,287                       | 22     | ,003            | -,60894         | ,18524                | -,99311                                   | -,22477  |
|                          | Equal variances not assumed |                                         |      | -3,287                       | 21,941 | ,003            | -,60894         | ,18524                | -,99317                                   | -,22471  |
| Bacteroides (CFU/mL)     | Equal variances assumed     | ,079                                    | ,782 | -4,739                       | 22     | ,000            | -,57336         | ,12099                | -,82428                                   | -,32244  |
|                          | Equal variances not assumed |                                         |      | -4,739                       | 21,951 | ,000            | -,57336         | ,12099                | -,82431                                   | -,32241  |
| Bifidobacterium (CFU/mL) | Equal variances assumed     | 1,078                                   | ,313 | -8,821                       | 18     | ,000            | -1,19920        | ,13594                | -1,48480                                  | -,91359  |
|                          | Equal variances not assumed |                                         |      | -9,166                       | 16,965 | ,000            | -1,19920        | ,13083                | -1,47526                                  | -,92313  |
| Coccoides (CFU/mL)       | Equal variances assumed     | 10,975                                  | ,003 | -10,635                      | 22     | ,000            | -1,11879        | ,10520                | -1,33695                                  | -,90062  |
|                          | Equal variances not assumed |                                         |      | -10,635                      | 13,212 | ,000            | -1,11879        | ,10520                | -1,34568                                  | -,89189  |
| Enterobacteria (CFU/mL)  | Equal variances assumed     | 1,276                                   | ,271 | -6,812                       | 22     | ,000            | -1,54664        | ,22703                | -2,01747                                  | -1,07580 |
|                          | Equal variances not assumed |                                         |      | -6,812                       | 18,517 | ,000            | -1,54664        | ,22703                | -2,02266                                  | -1,07061 |
| Enterococcus (CFU/mL)    | Equal variances assumed     | ,018                                    | ,894 | -3,494                       | 22     | ,002            | -,54786         | ,15681                | -,87307                                   | -,22266  |
|                          | Equal variances not assumed |                                         |      | -3,494                       | 21,954 | ,002            | -,54786         | ,15681                | -,87311                                   | -,22262  |
| Lactobacillus (CFU/mL)   | Equal variances assumed     | 19,298                                  | ,000 | -5,750                       | 26     | ,000            | -1,65439        | ,28770                | -2,24578                                  | -1,06301 |



|                             |  |  |        |        |      |          |        |          |         |
|-----------------------------|--|--|--------|--------|------|----------|--------|----------|---------|
| Equal variances not assumed |  |  | -5,051 | 12,199 | ,000 | -1,65439 | ,32754 | -2,36674 | -,94204 |
|-----------------------------|--|--|--------|--------|------|----------|--------|----------|---------|

**Independent Samples Test**

|                 |                             | Levene's Test for Equality of Variances |      | t-test for Equality of Means |       |                 |                 |                       |                                           |           |
|-----------------|-----------------------------|-----------------------------------------|------|------------------------------|-------|-----------------|-----------------|-----------------------|-------------------------------------------|-----------|
|                 |                             | F                                       | Sig. | t                            | df    | Sig. (2-tailed) | Mean Difference | Std. Error Difference | 95% Confidence Interval of the Difference |           |
|                 |                             |                                         |      |                              |       |                 |                 |                       | Lower                                     | Upper     |
| Acetate (mM)    | Equal variances assumed     | 20,678                                  | ,000 | -10,327                      | 14    | ,000            | -42,36062       | 4,10192               | -51,15838                                 | -33,56287 |
|                 | Equal variances not assumed |                                         |      | -10,327                      | 7,001 | ,000            | -42,36062       | 4,10192               | -52,05992                                 | -32,66132 |
| Lactate (mM)    | Equal variances assumed     | 66,681                                  | ,000 | -8,800                       | 14    | ,000            | -15,23179       | 1,73089               | -18,94417                                 | -11,51940 |
|                 | Equal variances not assumed |                                         |      | -8,800                       | 7,003 | ,000            | -15,23179       | 1,73089               | -19,32429                                 | -11,13928 |
| Butyrate (mM)   | Equal variances assumed     | 1282,401                                | ,000 | -8,954                       | 10    | ,000            | -5,68046        | ,63437                | -7,09393                                  | -4,26699  |
|                 | Equal variances not assumed |                                         |      | -6,009                       | 3,001 | ,009            | -5,68046        | ,94540                | -8,68864                                  | -2,67228  |
| Propionate (mM) | Equal variances assumed     | 25,114                                  | ,000 | -8,897                       | 14    | ,000            | -4,69919        | ,52819                | -5,83205                                  | -3,56633  |
|                 | Equal variances not assumed |                                         |      | -8,897                       | 7,031 | ,000            | -4,69919        | ,52819                | -5,94705                                  | -3,45133  |

**0 hours - MV Control 10 h**

**Independent Samples Test**

|                          |                             | Levene's Test for Equality of Variances |      | t-test for Equality of Means |        |                 |                 |                       |                                           |         |
|--------------------------|-----------------------------|-----------------------------------------|------|------------------------------|--------|-----------------|-----------------|-----------------------|-------------------------------------------|---------|
|                          |                             | F                                       | Sig. | t                            | df     | Sig. (2-tailed) | Mean Difference | Std. Error Difference | 95% Confidence Interval of the Difference |         |
|                          |                             |                                         |      |                              |        |                 |                 |                       | Lower                                     | Upper   |
| All bacteria (CFU/mL)    | Equal variances assumed     | 4,465                                   | ,044 | 3,596                        | 26     | ,001            | ,43658          | ,12143                | ,18699                                    | ,68618  |
|                          | Equal variances not assumed |                                         |      | 3,329                        | 16,212 | ,004            | ,43658          | ,13114                | ,15888                                    | ,71429  |
| Atopobium (CFU/mL)       | Equal variances assumed     | ,117                                    | ,736 | 1,600                        | 22     | ,124            | ,32293          | ,20184                | -,09566                                   | ,74151  |
|                          | Equal variances not assumed |                                         |      | 1,600                        | 21,718 | ,124            | ,32293          | ,20184                | -,09597                                   | ,74183  |
| Bacteroides (CFU/mL)     | Equal variances assumed     | 7,177                                   | ,014 | 2,570                        | 22     | ,017            | ,90645          | ,35271                | ,17496                                    | 1,63793 |
|                          | Equal variances not assumed |                                         |      | 2,570                        | 12,438 | ,024            | ,90645          | ,35271                | ,14094                                    | 1,67195 |
| Bifidobacterium (CFU/mL) | Equal variances assumed     | 4,048                                   | ,059 | ,966                         | 18     | ,347            | ,14869          | ,15400                | -,17486                                   | ,47224  |
|                          | Equal variances not assumed |                                         |      | 1,037                        | 17,905 | ,313            | ,14869          | ,14333                | -,15254                                   | ,44992  |
| Coccioides (CFU/mL)      | Equal variances assumed     | ,041                                    | ,842 | -4,799                       | 22     | ,000            | -,66363         | ,13829                | -,95044                                   | -,37683 |
|                          | Equal variances not assumed |                                         |      | -4,799                       | 21,944 | ,000            | -,66363         | ,13829                | -,95048                                   | -,37679 |
| Enterobacteria (CFU/mL)  | Equal variances assumed     | ,802                                    | ,381 | -5,560                       | 20     | ,000            | -1,10144        | ,19810                | -1,51467                                  | -,68822 |
|                          | Equal variances not assumed |                                         |      | -5,456                       | 17,410 | ,000            | -1,10144        | ,20188                | -1,52661                                  | -,67627 |
| Enterococcus (CFU/mL)    | Equal variances assumed     | 1,379                                   | ,253 | ,382                         | 22     | ,706            | ,08094          | ,21207                | -,35885                                   | ,52074  |

|                        |                             |       |      |      |        |      |        |        |         |        |
|------------------------|-----------------------------|-------|------|------|--------|------|--------|--------|---------|--------|
|                        | Equal variances not assumed |       |      | ,382 | 18,592 | ,707 | ,08094 | ,21207 | -,36357 | ,52546 |
| Lactobacillus (CFU/mL) | Equal variances assumed     | 9,083 | ,006 | ,718 | 26     | ,479 | ,20859 | ,29057 | -,38869 | ,80587 |
|                        | Equal variances not assumed |       |      | ,630 | 12,174 | ,540 | ,20859 | ,33094 | -,51133 | ,92851 |

**Independent Samples Test**

|                 |                             | Levene's Test for Equality of Variances |      | t-test for Equality of Means |       |                 |                 |                       |                                           |          |
|-----------------|-----------------------------|-----------------------------------------|------|------------------------------|-------|-----------------|-----------------|-----------------------|-------------------------------------------|----------|
|                 |                             | F                                       | Sig. | t                            | df    | Sig. (2-tailed) | Mean Difference | Std. Error Difference | 95% Confidence Interval of the Difference |          |
|                 |                             |                                         |      |                              |       |                 |                 |                       | Lower                                     | Upper    |
| Acetate (mM)    | Equal variances assumed     | 30,869                                  | ,000 | -20,775                      | 11    | ,000            | -6,62489        | ,31889                | -7,32675                                  | -5,92302 |
|                 | Equal variances not assumed |                                         |      | -16,045                      | 4,042 | ,000            | -6,62489        | ,41289                | -7,76653                                  | -5,48324 |
| Lactate (mM)    | Equal variances assumed     | 11,993                                  | ,004 | 4,014                        | 13    | ,001            | ,11471          | ,02858                | ,05298                                    | ,17644   |
|                 | Equal variances not assumed |                                         |      | 4,312                        | 7,000 | ,004            | ,11471          | ,02660                | ,05181                                    | ,17761   |
| Butyrate (mM)   | Equal variances assumed     | 9,677                                   | ,008 | -3,452                       | 13    | ,004            | -,71873         | ,20823                | -1,16859                                  | -,26887  |
|                 | Equal variances not assumed |                                         |      | -3,212                       | 6,032 | ,018            | -,71873         | ,22374                | -1,26550                                  | -,17196  |
| Propionate (mM) | Equal variances assumed     | 7,762                                   | ,018 | -5,472                       | 11    | ,000            | -1,41570        | ,25870                | -1,98510                                  | -,84631  |
|                 | Equal variances not assumed |                                         |      | -4,227                       | 4,044 | ,013            | -1,41570        | ,33489                | -2,34150                                  | -,48991  |

**0 hours - Negative Control 24 h**

**Independent Samples Test**

|                          |                             | Levene's Test for Equality of Variances |      | t-test for Equality of Means |        |                 |                 |                       |                                           |        |
|--------------------------|-----------------------------|-----------------------------------------|------|------------------------------|--------|-----------------|-----------------|-----------------------|-------------------------------------------|--------|
|                          |                             | F                                       | Sig. | t                            | df     | Sig. (2-tailed) | Mean Difference | Std. Error Difference | 95% Confidence Interval of the Difference |        |
|                          |                             |                                         |      |                              |        |                 |                 |                       | Lower                                     | Upper  |
| All bacteria (CFU/mL)    | Equal variances assumed     | 2,643                                   | ,114 | 1,189                        | 30     | ,244            | ,08154          | ,06860                | -,05855                                   | ,22164 |
|                          | Equal variances not assumed |                                         |      | 1,189                        | 25,663 | ,245            | ,08154          | ,06860                | -,05955                                   | ,22264 |
| Atopobium (CFU/mL)       | Equal variances assumed     | 12,766                                  | ,002 | -1,082                       | 22     | ,291            | -,15352         | ,14182                | -,44764                                   | ,14060 |
|                          | Equal variances not assumed |                                         |      | -1,082                       | 13,483 | ,298            | -,15352         | ,14182                | -,45879                                   | ,15175 |
| Bacteroides (CFU/mL)     | Equal variances assumed     | 1,461                                   | ,240 | 3,337                        | 22     | ,003            | ,49431          | ,14812                | ,18713                                    | ,80149 |
|                          | Equal variances not assumed |                                         |      | 3,337                        | 20,169 | ,003            | ,49431          | ,14812                | ,18550                                    | ,80312 |
| Bifidobacterium (CFU/mL) | Equal variances assumed     | ,077                                    | ,786 | ,181                         | 14     | ,859            | ,02160          | ,11947                | -,23463                                   | ,27784 |
|                          | Equal variances not assumed |                                         |      | ,181                         | 13,345 | ,859            | ,02160          | ,11947                | -,23582                                   | ,27902 |
| Coccoides (CFU/mL)       | Equal variances assumed     | 8,223                                   | ,009 | ,688                         | 22     | ,499            | ,07447          | ,10830                | -,15014                                   | ,29907 |
|                          | Equal variances not assumed |                                         |      | ,688                         | 14,587 | ,503            | ,07447          | ,10830                | -,15695                                   | ,30588 |

|                         |                             |        |      |        |        |      |          |        |          |         |
|-------------------------|-----------------------------|--------|------|--------|--------|------|----------|--------|----------|---------|
| Enterobacteria (CFU/mL) | Equal variances assumed     | ,775   | ,388 | -7,198 | 22     | ,000 | -1,39013 | ,19312 | -1,79064 | -,98963 |
|                         | Equal variances not assumed |        |      | -7,198 | 21,008 | ,000 | -1,39013 | ,19312 | -1,79174 | -,98853 |
| Enterococcus (CFU/mL)   | Equal variances assumed     | 10,490 | ,004 | -1,955 | 22     | ,063 | -,24411  | ,12483 | -,50300  | ,01478  |
|                         | Equal variances not assumed |        |      | -1,955 | 15,460 | ,069 | -,24411  | ,12483 | -,50950  | ,02128  |
| Lactobacillus (CFU/mL)  | Equal variances assumed     | 12,385 | ,001 | -1,131 | 30     | ,267 | -,22149  | ,19575 | -,62126  | ,17829  |
|                         | Equal variances not assumed |        |      | -1,131 | 19,910 | ,271 | -,22149  | ,19575 | -,62994  | ,18696  |

#### Independent Samples Test

|                 |                             | Levene's Test for Equality of Variances |      | t-test for Equality of Means |       |                 |                 |                       |                                           |           |
|-----------------|-----------------------------|-----------------------------------------|------|------------------------------|-------|-----------------|-----------------|-----------------------|-------------------------------------------|-----------|
|                 |                             | F                                       | Sig. | t                            | df    | Sig. (2-tailed) | Mean Difference | Std. Error Difference | 95% Confidence Interval of the Difference |           |
|                 |                             |                                         |      |                              |       |                 |                 |                       | Lower                                     | Upper     |
| Acetate (mM)    | Equal variances assumed     | 18,335                                  | ,001 | -22,899                      | 14    | ,000            | -12,26565       | ,53564                | -13,41448                                 | -11,11682 |
|                 | Equal variances not assumed |                                         |      | -22,899                      | 7,044 | ,000            | -12,26565       | ,53564                | -13,53064                                 | -11,00067 |
| Lactate (mM)    | Equal variances assumed     | 13,838                                  | ,002 | 4,312                        | 14    | ,001            | ,11471          | ,02660                | ,05765                                    | ,17177    |
|                 | Equal variances not assumed |                                         |      | 4,312                        | 7,000 | ,004            | ,11471          | ,02660                | ,05181                                    | ,17761    |
| Butyrate (mM)   | Equal variances assumed     | 13,536                                  | ,002 | -13,375                      | 14    | ,000            | -2,34359        | ,17522                | -2,71940                                  | -1,96778  |
|                 | Equal variances not assumed |                                         |      | -13,375                      | 7,062 | ,000            | -2,34359        | ,17522                | -2,75719                                  | -1,92999  |
| Propionate (mM) | Equal variances assumed     | 8,199                                   | ,013 | -18,730                      | 14    | ,000            | -2,37503        | ,12680                | -2,64700                                  | -2,10306  |
|                 | Equal variances not assumed |                                         |      | -18,730                      | 7,557 | ,000            | -2,37503        | ,12680                | -2,67045                                  | -2,07960  |

#### 0 hours - mMV-GOS 24 h

#### Independent Samples Test

|                          |                             | Levene's Test for Equality of Variances |      | t-test for Equality of Means |        |                 |                 |                       |                                           |         |
|--------------------------|-----------------------------|-----------------------------------------|------|------------------------------|--------|-----------------|-----------------|-----------------------|-------------------------------------------|---------|
|                          |                             | F                                       | Sig. | t                            | df     | Sig. (2-tailed) | Mean Difference | Std. Error Difference | 95% Confidence Interval of the Difference |         |
|                          |                             |                                         |      |                              |        |                 |                 |                       | Lower                                     | Upper   |
| All bacteria (CFU/mL)    | Equal variances assumed     | 7,600                                   | ,010 | -4,719                       | 30     | ,000            | -,29788         | ,06312                | -,42679                                   | -,16896 |
|                          | Equal variances not assumed |                                         |      | -4,719                       | 20,774 | ,000            | -,29788         | ,06312                | -,42924                                   | -,16652 |
| Atopobium (CFU/mL)       | Equal variances assumed     | 4,171                                   | ,053 | -4,680                       | 22     | ,000            | -,73331         | ,15668                | -1,05824                                  | -,40837 |
|                          | Equal variances not assumed |                                         |      | -4,680                       | 18,013 | ,000            | -,73331         | ,15668                | -1,06247                                  | -,40415 |
| Bacteroides (CFU/mL)     | Equal variances assumed     | ,334                                    | ,569 | -3,207                       | 22     | ,004            | -,37306         | ,11634                | -,61433                                   | -,13179 |
|                          | Equal variances not assumed |                                         |      | -3,207                       | 21,620 | ,004            | -,37306         | ,11634                | -,61458                                   | -,13155 |
| Bifidobacterium (CFU/mL) | Equal variances assumed     | 2,699                                   | ,123 | -3,772                       | 14     | ,002            | -,39198         | ,10392                | -,61488                                   | -,16908 |

|                         |                             |        |      |        |        |      |          |        |          |          |
|-------------------------|-----------------------------|--------|------|--------|--------|------|----------|--------|----------|----------|
|                         | Equal variances not assumed |        |      | -3,772 | 10,165 | ,004 | -,39198  | ,10392 | -,62303  | -,16093  |
| Coccioides (CFU/mL)     | Equal variances assumed     | 6,389  | ,019 | -5,258 | 22     | ,000 | -,57743  | ,10981 | -,80516  | -,34969  |
|                         | Equal variances not assumed |        |      | -5,258 | 15,238 | ,000 | -,57743  | ,10981 | -,81117  | -,34369  |
| Enterobacteria (CFU/mL) | Equal variances assumed     | ,450   | ,510 | -8,788 | 22     | ,000 | -1,62968 | ,18545 | -2,01428 | -1,24508 |
|                         | Equal variances not assumed |        |      | -8,788 | 21,508 | ,000 | -1,62968 | ,18545 | -2,01479 | -1,24457 |
| Enterococcus (CFU/mL)   | Equal variances assumed     | ,671   | ,421 | -6,151 | 22     | ,000 | -,92081  | ,14971 | -1,23128 | -,61034  |
|                         | Equal variances not assumed |        |      | -6,151 | 21,531 | ,000 | -,92081  | ,14971 | -1,23167 | -,60995  |
| Lactobacillus (CFU/mL)  | Equal variances assumed     | 20,455 | ,000 | -5,677 | 30     | ,000 | -1,62434 | ,28613 | -2,20869 | -1,03998 |
|                         | Equal variances not assumed |        |      | -5,677 | 17,158 | ,000 | -1,62434 | ,28613 | -2,22760 | -1,02108 |

#### Independent Samples Test

|                 |                             | Levene's Test for Equality of Variances |      | t-test for Equality of Means |       |                 |                 |                       |                                           |           |
|-----------------|-----------------------------|-----------------------------------------|------|------------------------------|-------|-----------------|-----------------|-----------------------|-------------------------------------------|-----------|
|                 |                             | F                                       | Sig. | t                            | df    | Sig. (2-tailed) | Mean Difference | Std. Error Difference | 95% Confidence Interval of the Difference |           |
|                 |                             |                                         |      |                              |       |                 |                 |                       | Lower                                     | Upper     |
| Acetate (mM)    | Equal variances assumed     | 14,956                                  | ,002 | -27,383                      | 14    | ,000            | -30,04930       | 1,09735               | -32,40289                                 | -27,69571 |
|                 | Equal variances not assumed |                                         |      | -27,383                      | 7,010 | ,000            | -30,04930       | 1,09735               | -32,64335                                 | -27,45525 |
| Lactate (mM)    | Equal variances assumed     | 13,838                                  | ,002 | 4,312                        | 14    | ,001            | ,11471          | ,02660                | ,05765                                    | ,17177    |
|                 | Equal variances not assumed |                                         |      | 4,312                        | 7,000 | ,004            | ,11471          | ,02660                | ,05181                                    | ,17761    |
| Butyrate (mM)   | Equal variances assumed     | 19,251                                  | ,001 | -9,128                       | 14    | ,000            | -7,16525        | ,78497                | -8,84885                                  | -5,48166  |
|                 | Equal variances not assumed |                                         |      | -9,128                       | 7,003 | ,000            | -7,16525        | ,78497                | -9,02125                                  | -5,30926  |
| Propionate (mM) | Equal variances assumed     | 13,924                                  | ,002 | -18,364                      | 14    | ,000            | -14,03637       | ,76435                | -15,67574                                 | -12,39700 |
|                 | Equal variances not assumed |                                         |      | -18,364                      | 7,015 | ,000            | -14,03637       | ,76435                | -15,84300                                 | -12,22974 |

#### 0 hours - Positive Control 24 h

#### Independent Samples Test

|                       |                             | Levene's Test for Equality of Variances |      | t-test for Equality of Means |        |                 |                 |                       |                                           |         |
|-----------------------|-----------------------------|-----------------------------------------|------|------------------------------|--------|-----------------|-----------------|-----------------------|-------------------------------------------|---------|
|                       |                             | F                                       | Sig. | t                            | df     | Sig. (2-tailed) | Mean Difference | Std. Error Difference | 95% Confidence Interval of the Difference |         |
|                       |                             |                                         |      |                              |        |                 |                 |                       | Lower                                     | Upper   |
| All bacteria (CFU/mL) | Equal variances assumed     | ,357                                    | ,555 | -2,849                       | 30     | ,008            | -,21096         | ,07404                | -,36217                                   | -,05974 |
|                       | Equal variances not assumed |                                         |      | -2,849                       | 28,719 | ,008            | -,21096         | ,07404                | -,36246                                   | -,05946 |
| Atopobium (CFU/mL)    | Equal variances assumed     | 1,154                                   | ,294 | -2,466                       | 22     | ,022            | -,70861         | ,28731                | -1,30444                                  | -,11277 |
|                       | Equal variances not assumed |                                         |      | -2,466                       | 16,710 | ,025            | -,70861         | ,28731                | -1,31557                                  | -,10164 |

|                          |                             |        |      |        |        |      |          |        |          |         |
|--------------------------|-----------------------------|--------|------|--------|--------|------|----------|--------|----------|---------|
| Bacteroides (CFU/mL)     | Equal variances assumed     | ,419   | ,524 | ,004   | 22     | ,997 | ,00051   | ,13564 | -,28079  | ,28180  |
|                          | Equal variances not assumed |        |      | ,004   | 21,405 | ,997 | ,00051   | ,13564 | -,28124  | ,28225  |
| Bifidobacterium (CFU/mL) | Equal variances assumed     | ,182   | ,676 | -2,675 | 14     | ,018 | -,37834  | ,14145 | -,68171  | -,07497 |
|                          | Equal variances not assumed |        |      | -2,675 | 13,772 | ,018 | -,37834  | ,14145 | -,68218  | -,07450 |
| Coccolides (CFU/mL)      | Equal variances assumed     | 4,162  | ,054 | -2,400 | 22     | ,025 | -,27165  | ,11319 | -,50640  | -,03690 |
|                          | Equal variances not assumed |        |      | -2,400 | 16,632 | ,028 | -,27165  | ,11319 | -,51087  | -,03243 |
| Enterobacteria (CFU/mL)  | Equal variances assumed     | 6,284  | ,020 | -5,660 | 22     | ,000 | -1,56863 | ,27714 | -2,14338 | -,99387 |
|                          | Equal variances not assumed |        |      | -5,660 | 15,892 | ,000 | -1,56863 | ,27714 | -2,15647 | -,98079 |
| Enterococcus (CFU/mL)    | Equal variances assumed     | 12,788 | ,002 | -4,970 | 22     | ,000 | -,60719  | ,12216 | -,86054  | -,35384 |
|                          | Equal variances not assumed |        |      | -4,970 | 14,443 | ,000 | -,60719  | ,12216 | -,86845  | -,34593 |
| Lactobacillus (CFU/mL)   | Equal variances assumed     | 28,061 | ,000 | -2,305 | 30     | ,028 | -,91109  | ,39526 | -1,71833 | -,10386 |
|                          | Equal variances not assumed |        |      | -2,305 | 16,097 | ,035 | -,91109  | ,39526 | -1,74861 | -,07358 |

#### Independent Samples Test

|                 | Levene's Test for Equality of Variances |           | t-test for Equality of Means |         |                 |                 |                       |                                           |           |           |
|-----------------|-----------------------------------------|-----------|------------------------------|---------|-----------------|-----------------|-----------------------|-------------------------------------------|-----------|-----------|
|                 | F                                       | Sig.      | t                            | df      | Sig. (2-tailed) | Mean Difference | Std. Error Difference | 95% Confidence Interval of the Difference |           |           |
|                 |                                         |           |                              |         |                 |                 |                       | Lower                                     | Upper     |           |
| Acetate (mM)    | Equal variances assumed                 | 6,772     | ,026                         | -18,653 | 10              | ,000            | -42,81385             | 2,29530                                   | -47,92810 | -37,69959 |
|                 | Equal variances not assumed             |           |                              | -12,514 | 3,000           | ,001            | -42,81385             | 3,42116                                   | -53,70056 | -31,92713 |
| Lactate (mM)    | Equal variances assumed                 | 6,590     | ,028                         | 2,976   | 10              | ,014            | ,11471                | ,03855                                    | ,02882    | ,20060    |
|                 | Equal variances not assumed             |           |                              | 4,312   | 7,000           | ,004            | ,11471                | ,02660                                    | ,05181    | ,17761    |
| Butyrate (mM)   | Equal variances assumed                 | 13,466    | ,004                         | -6,357  | 10              | ,000            | -6,20452              | ,97602                                    | -8,37923  | -4,02982  |
|                 | Equal variances not assumed             |           |                              | -4,265  | 3,000           | ,024            | -6,20452              | 1,45480                                   | -10,83400 | -1,57505  |
| Propionate (mM) | Equal variances assumed                 | 12548,358 | ,000                         | -6,763  | 8               | ,000            | -6,62549              | ,97968                                    | -8,88464  | -4,36633  |
|                 | Equal variances not assumed             |           |                              | -2,677  | 1,000           | ,228            | -6,62549              | 2,47506                                   | -38,05922 | 24,80824  |

#### 0 hours - GOS Control 24 h

#### Independent Samples Test

|                       | Levene's Test for Equality of Variances |      | t-test for Equality of Means |        |                 |                 |                       |                                           |         |         |
|-----------------------|-----------------------------------------|------|------------------------------|--------|-----------------|-----------------|-----------------------|-------------------------------------------|---------|---------|
|                       | F                                       | Sig. | t                            | df     | Sig. (2-tailed) | Mean Difference | Std. Error Difference | 95% Confidence Interval of the Difference |         |         |
|                       |                                         |      |                              |        |                 |                 |                       | Lower                                     | Upper   |         |
| All bacteria (CFU/mL) | Equal variances assumed                 | ,004 | ,952                         | -2,992 | 28              | ,006            | -,24548               | ,08205                                    | -,41354 | -,07742 |

|                          |                             |         |      |        |        |      |          |        |          |          |
|--------------------------|-----------------------------|---------|------|--------|--------|------|----------|--------|----------|----------|
|                          | Equal variances not assumed |         |      | -3,005 | 27,836 | ,006 | -.24548  | ,08170 | -.41287  | -.07808  |
| Atopobium (CFU/mL)       | Equal variances assumed     | ,154    | ,699 | -3,063 | 22     | ,006 | -.63474  | ,20724 | -1,06453 | -.20495  |
|                          | Equal variances not assumed |         |      | -3,063 | 21,454 | ,006 | -.63474  | ,20724 | -1,06516 | -.20431  |
| Bacteroides (CFU/mL)     | Equal variances assumed     | 1,087   | ,309 | -.641  | 22     | ,528 | -.09428  | ,14713 | -.39941  | ,21085   |
|                          | Equal variances not assumed |         |      | -.641  | 20,273 | ,529 | -.09428  | ,14713 | -.40093  | ,21236   |
| Bifidobacterium (CFU/mL) | Equal variances assumed     | 1,561   | ,232 | -1,016 | 14     | ,327 | -.17754  | ,17476 | -.55238  | ,19729   |
|                          | Equal variances not assumed |         |      | -1,016 | 11,822 | ,330 | -.17754  | ,17476 | -.55896  | ,20387   |
| Coccolides (CFU/mL)      | Equal variances assumed     | ,283    | ,600 | -3,128 | 22     | ,005 | -.49854  | ,15939 | -.82911  | -.16798  |
|                          | Equal variances not assumed |         |      | -3,128 | 21,078 | ,005 | -.49854  | ,15939 | -.82995  | -.16714  |
| Enterobacteria (CFU/mL)  | Equal variances assumed     | 1,276   | ,271 | -6,812 | 22     | ,000 | -1,54664 | ,22703 | -2,01747 | -1,07580 |
|                          | Equal variances not assumed |         |      | -6,812 | 18,517 | ,000 | -1,54664 | ,22703 | -2,02266 | -1,07061 |
| Enterococcus (CFU/mL)    | Equal variances assumed     | ,008    | ,929 | -3,436 | 22     | ,002 | -.53183  | ,15477 | -.85280  | -.21086  |
|                          | Equal variances not assumed |         |      | -3,436 | 21,881 | ,002 | -.53183  | ,15477 | -.85290  | -.21075  |
| Lactobacillus (CFU/mL)   | Equal variances assumed     | 121,438 | ,000 | -2,803 | 25     | ,010 | -1,41239 | ,50388 | -2,45016 | -.37462  |
|                          | Equal variances not assumed |         |      | -2,323 | 10,304 | ,042 | -1,41239 | ,60797 | -2,76162 | -.06315  |

#### Independent Samples Test

|                 |                             | Levene's Test for Equality of Variances |      | t-test for Equality of Means |       |                 |                 |                       |                                           |           |
|-----------------|-----------------------------|-----------------------------------------|------|------------------------------|-------|-----------------|-----------------|-----------------------|-------------------------------------------|-----------|
|                 |                             | F                                       | Sig. | t                            | df    | Sig. (2-tailed) | Mean Difference | Std. Error Difference | 95% Confidence Interval of the Difference |           |
|                 |                             |                                         |      |                              |       |                 |                 |                       | Lower                                     | Upper     |
| Acetate (mM)    | Equal variances assumed     | 17,371                                  | ,001 | -10,555                      | 12    | ,000            | -55,38478       | 5,24729               | -66,81763                                 | -43,95192 |
|                 | Equal variances not assumed |                                         |      | -9,013                       | 5,000 | ,000            | -55,38478       | 6,14493               | -71,18060                                 | -39,58895 |
| Lactate (mM)    | Equal variances assumed     | 6,590                                   | ,028 | 2,976                        | 10    | ,014            | ,11471          | ,03855                | ,02882                                    | ,20060    |
|                 | Equal variances not assumed |                                         |      | 4,312                        | 7,000 | ,004            | ,11471          | ,02660                | ,05181                                    | ,17761    |
| Butyrate (mM)   | Equal variances assumed     | 19,024                                  | ,001 | -7,467                       | 12    | ,000            | -12,99439       | 1,74033               | -16,78625                                 | -9,20254  |
|                 | Equal variances not assumed |                                         |      | -6,376                       | 5,000 | ,001            | -12,99439       | 2,03804               | -18,23323                                 | -7,75556  |
| Propionate (mM) | Equal variances assumed     | 35,221                                  | ,000 | -7,380                       | 11    | ,000            | -13,05754       | 1,76936               | -16,95188                                 | -9,16321  |
|                 | Equal variances not assumed |                                         |      | -5,673                       | 4,001 | ,005            | -13,05754       | 2,30150               | -19,44694                                 | -6,66815  |

0 hours - MV Control 24 h

#### Independent Samples Test

|  |  | Levene's Test for Equality of Variances |      | t-test for Equality of Means |    |                 |                 |                       |                                           |
|--|--|-----------------------------------------|------|------------------------------|----|-----------------|-----------------|-----------------------|-------------------------------------------|
|  |  | F                                       | Sig. | t                            | df | Sig. (2-tailed) | Mean Difference | Std. Error Difference | 95% Confidence Interval of the Difference |
|  |  |                                         |      |                              |    |                 |                 |                       |                                           |

|                          |                             |        |      |        |        |      |          |        | Lower    | Upper   |
|--------------------------|-----------------------------|--------|------|--------|--------|------|----------|--------|----------|---------|
| All bacteria (CFU/mL)    | Equal variances assumed     | ,521   | ,476 | 2,724  | 30     | ,011 | ,24952   | ,09159 | ,06247   | ,43656  |
|                          | Equal variances not assumed |        |      | 2,724  | 28,751 | ,011 | ,24952   | ,09159 | ,06213   | ,43690  |
| Atopobium (CFU/mL)       | Equal variances assumed     | 8,829  | ,007 | ,991   | 21     | ,333 | ,31610   | ,31904 | -,34738  | ,97957  |
|                          | Equal variances not assumed |        |      | ,962   | 13,910 | ,352 | ,31610   | ,32850 | -,38889  | 1,02108 |
| Bacteroides (CFU/mL)     | Equal variances assumed     | 8,626  | ,008 | 3,587  | 22     | ,002 | 1,13393  | ,31614 | ,47830   | 1,78956 |
|                          | Equal variances not assumed |        |      | 3,587  | 12,815 | ,003 | 1,13393  | ,31614 | ,44995   | 1,81790 |
| Bifidobacterium (CFU/mL) | Equal variances assumed     | 6,758  | ,021 | 2,227  | 14     | ,043 | ,61669   | ,27691 | ,02278   | 1,21060 |
|                          | Equal variances not assumed |        |      | 2,227  | 8,767  | ,054 | ,61669   | ,27691 | -,01227  | 1,24565 |
| Coccolides (CFU/mL)      | Equal variances assumed     | 7,369  | ,013 | 2,434  | 22     | ,024 | ,66847   | ,27468 | ,09882   | 1,23813 |
|                          | Equal variances not assumed |        |      | 2,434  | 14,301 | ,029 | ,66847   | ,27468 | ,08050   | 1,25644 |
| Enterobacteria (CFU/mL)  | Equal variances assumed     | ,802   | ,381 | -5,560 | 20     | ,000 | -1,10144 | ,19810 | -1,51467 | -,68822 |
|                          | Equal variances not assumed |        |      | -5,456 | 17,410 | ,000 | -1,10144 | ,20188 | -1,52661 | -,67627 |
| Enterococcus (CFU/mL)    | Equal variances assumed     | 5,104  | ,034 | 1,638  | 22     | ,116 | ,45753   | ,27941 | -,12192  | 1,03699 |
|                          | Equal variances not assumed |        |      | 1,638  | 15,176 | ,122 | ,45753   | ,27941 | -,13741  | 1,05247 |
| Lactobacillus (CFU/mL)   | Equal variances assumed     | 12,201 | ,002 | ,705   | 30     | ,486 | ,23886   | ,33884 | -,45315  | ,93088  |
|                          | Equal variances not assumed |        |      | ,705   | 16,511 | ,491 | ,23886   | ,33884 | -,47765  | ,95538  |

**Independent Samples Test**

|                 |                             | Levene's Test for Equality of Variances |      | t-test for Equality of Means |       |                 |                 |                       |                                           |          |
|-----------------|-----------------------------|-----------------------------------------|------|------------------------------|-------|-----------------|-----------------|-----------------------|-------------------------------------------|----------|
|                 |                             | F                                       | Sig. | t                            | df    | Sig. (2-tailed) | Mean Difference | Std. Error Difference | 95% Confidence Interval of the Difference |          |
|                 |                             |                                         |      |                              |       |                 |                 |                       | Lower                                     | Upper    |
| Acetate (mM)    | Equal variances assumed     | 43,875                                  | ,000 | -12,111                      | 12    | ,000            | -11,55655       | ,95418                | -13,63553                                 | -9,47757 |
|                 | Equal variances not assumed |                                         |      | -10,345                      | 5,007 | ,000            | -11,55655       | 1,11707               | -14,42684                                 | -8,68626 |
| Lactate (mM)    | Equal variances assumed     | 13,838                                  | ,002 | 4,312                        | 14    | ,001            | ,11471          | ,02660                | ,05765                                    | ,17177   |
|                 | Equal variances not assumed |                                         |      | 4,312                        | 7,000 | ,004            | ,11471          | ,02660                | ,05181                                    | ,17761   |
| Butyrate (mM)   | Equal variances assumed     | 46,871                                  | ,000 | -11,599                      | 12    | ,000            | -2,02005        | ,17416                | -2,39952                                  | -1,64058 |
|                 | Equal variances not assumed |                                         |      | -9,918                       | 5,033 | ,000            | -2,02005        | ,20367                | -2,54259                                  | -1,49752 |
| Propionate (mM) | Equal variances assumed     | 27,636                                  | ,000 | -12,769                      | 12    | ,000            | -2,25600        | ,17667                | -2,64093                                  | -1,87106 |
|                 | Equal variances not assumed |                                         |      | -10,973                      | 5,148 | ,000            | -2,25600        | ,20560                | -2,77997                                  | -1,73202 |

## 2. Oneway ANOVA

### Homogeneous Subsets 10 h

#### Lactobacillus (CFU/mL)

Tukey HSD<sup>a</sup>

| Samples          | N  | Subset for alpha = 0.05 |                       |
|------------------|----|-------------------------|-----------------------|
|                  |    | 1                       | 2                     |
| MV Control       | 12 | 4,85101419105<br>8348   |                       |
| Negative Control | 12 | 4,96377288639<br>2285   | 4,96377288639<br>2285 |
| Positive Control | 12 | 5,73781118888<br>5442   | 5,73781118888<br>5442 |
| GOS Control      | 12 | 5,82640719919<br>7508   | 5,82640719919<br>7508 |
| mMV-GOS          | 12 |                         | 6,40657147412<br>6737 |
| Sig.             |    | ,336                    | ,053                  |

Means for groups in homogeneous subsets are displayed.

a. Uses Harmonic Mean Sample Size = 12.000.

#### All bacteria (CFU/mL)

Tukey HSD<sup>a</sup>

| Samples          | N  | Subset for alpha = 0.05 |                       |
|------------------|----|-------------------------|-----------------------|
|                  |    | 1                       | 2                     |
| MV Control       | 12 | 8,84105457149<br>9614   |                       |
| Negative Control | 12 | 9,01165211532<br>7436   |                       |
| Positive Control | 12 |                         | 9,32246741708<br>7195 |
| GOS Control      | 12 |                         | 9,35388586613<br>2599 |
| mMV-GOS          | 12 |                         | 9,38861743373<br>4767 |
| Sig.             |    | ,403                    | ,959                  |

Means for groups in homogeneous subsets are displayed.

a. Uses Harmonic Mean Sample Size = 12.000.

#### Atopobium (CFU/mL)

Tukey HSD<sup>a</sup>

| Samples          | N  | Subset for alpha = 0.05 |                       |                       |
|------------------|----|-------------------------|-----------------------|-----------------------|
|                  |    | 1                       | 2                     | 3                     |
| MV Control       | 12 | 7,52569056944<br>2940   |                       |                       |
| Negative Control | 12 | 7,85120734849<br>7070   | 7,85120734849<br>7070 |                       |
| mMV-GOS          | 12 |                         | 8,22635649372<br>5467 | 8,22635649372<br>5467 |
| Positive Control | 12 |                         |                       | 8,37962557315<br>7968 |
| GOS Control      | 12 |                         |                       | 8,45755575964<br>9864 |
| Sig.             |    | ,378                    | ,240                  | ,701                  |

Means for groups in homogeneous subsets are displayed.

a. Uses Harmonic Mean Sample Size = 12.000.

#### Bacteroides (CFU/mL)

Tukey HSD<sup>a</sup>

| Samples          | N  | Subset for alpha = 0.05 |                       |
|------------------|----|-------------------------|-----------------------|
|                  |    | 1                       | 2                     |
| Negative Control | 12 | 7,83567281604<br>0922   |                       |
| MV Control       | 12 | 8,05322449472<br>3771   |                       |
| GOS Control      | 12 |                         | 9,53303329472<br>4298 |
| Positive Control | 12 |                         | 9,62531789725<br>9213 |
| mMV-GOS          | 12 |                         | 9,73339438998<br>6302 |
| Sig.             |    | ,955                    | ,966                  |

Means for groups in homogeneous subsets are displayed.



a. Uses Harmonic Mean Sample Size = 12.000.

**Bifidobacterium (CFU/mL)**

Tukey HSD<sup>a,b</sup>

| Samples          | N  | Subset for alpha = 0.05 |                       |                       |
|------------------|----|-------------------------|-----------------------|-----------------------|
|                  |    | 1                       | 2                     | 3                     |
| MV Control       | 12 | 7,83818403194<br>9150   |                       |                       |
| Negative Control | 8  | 7,93717916836<br>8507   |                       |                       |
| mMV-GOS          | 12 |                         | 8,49408883508<br>9634 |                       |
| Positive Control | 20 |                         | 8,91067560562<br>7613 | 8,91067560562<br>7613 |
| GOS Control      | 12 |                         |                       | 9,18606953674<br>7803 |
| Sig.             |    | ,980                    | ,144                  | ,533                  |

Means for groups in homogeneous subsets are displayed.

a. Uses Harmonic Mean Sample Size = 11.765.

b. The group sizes are unequal. The harmonic mean of the group sizes is used. Type I error levels are not guaranteed.

**Coccoides (CFU/mL)**

Tukey HSD<sup>a</sup>

| Samples          | N  | Subset for alpha = 0.05 |                       |                       |
|------------------|----|-------------------------|-----------------------|-----------------------|
|                  |    | 1                       | 2                     | 3                     |
| MV Control       | 12 | 5,52693439372<br>4177   |                       |                       |
| Negative Control | 12 |                         | 5,80878299273<br>2025 |                       |
| Positive Control | 12 |                         | 5,98105742034<br>0448 | 5,98105742034<br>0448 |
| GOS Control      | 12 |                         | 5,98209013291<br>1061 | 5,98209013291<br>1061 |
| mMV-GOS          | 12 |                         |                       | 6,14623797302<br>1997 |

|      |  |       |      |      |
|------|--|-------|------|------|
| Sig. |  | 1,000 | ,318 | ,366 |
|------|--|-------|------|------|

Means for groups in homogeneous subsets are displayed.

a. Uses Harmonic Mean Sample Size = 12.000.

**Enterobacteria (CFU/mL)**

Tukey HSD<sup>a,b</sup>

| Samples          | N  | Subset for alpha = 0.05 |
|------------------|----|-------------------------|
|                  |    | 1                       |
| MV Control       | 10 | 7,70739890906<br>0503   |
| Negative Control | 12 | 7,99609094406<br>9523   |
| GOS Control      | 12 | 8,15259221900<br>6237   |
| Positive Control | 12 | 8,17458540309<br>1575   |
| mMV-GOS          | 12 | 8,23563345478<br>4672   |
| Sig.             |    | ,274                    |

Means for groups in homogeneous subsets are displayed.

a. Uses Harmonic Mean Sample Size = 11.538.

b. The group sizes are unequal. The harmonic mean of the group sizes is used. Type I error levels are not guaranteed.

**Enterococcus (CFU/mL)**

Tukey HSD<sup>a,b</sup>

| Samples          | N  | Subset for alpha = 0.05 |                       |                       |
|------------------|----|-------------------------|-----------------------|-----------------------|
|                  |    | 1                       | 2                     | 3                     |
| MV Control       | 12 | 7,32310408978<br>9116   |                       |                       |
| Negative Control | 9  | 7,51939397477<br>3051   | 7,51939397477<br>3051 |                       |
| Positive Control | 12 |                         | 7,94753032680<br>0088 | 7,94753032680<br>0088 |
| GOS Control      | 12 |                         | 7,95190808029<br>0234 | 7,95190808029<br>0234 |

|         |    |      |      |               |
|---------|----|------|------|---------------|
| mMV-GOS | 12 |      |      | 8,16508632557 |
| Sig.    |    | ,813 | ,134 | ,750          |

Means for groups in homogeneous subsets are displayed.

a. Uses Harmonic Mean Sample Size = 11.250.

b. The group sizes are unequal. The harmonic mean of the group sizes is used. Type I error levels are not guaranteed.

### Lactate

Tukey HSD<sup>a,b</sup>

| SAMPLE           | N | Subset for alpha = 0.05 |         |
|------------------|---|-------------------------|---------|
|                  |   | 1                       | 2       |
| MV Control       | 7 | ,0000                   |         |
| Negative Control | 8 | ,0299                   |         |
| mMV-GOS          | 8 | 2,5160                  |         |
| GOS Control      | 8 |                         | 15,3465 |
| Positive Control | 8 |                         | 20,9027 |
| Sig.             |   | ,760                    | ,090    |

Means for groups in homogeneous subsets are displayed.

a. Uses Harmonic Mean Sample Size = 7.778.

b. The group sizes are unequal. The harmonic mean of the group sizes is used. Type I error levels are not guaranteed.

### Acetate

Tukey HSD<sup>a,b</sup>

| SAMPLE           | N | Subset for alpha = 0.05 |         |         |
|------------------|---|-------------------------|---------|---------|
|                  |   | 1                       | 2       | 3       |
| MV Control       | 5 | 7,3509                  |         |         |
| Negative Control | 8 | 8,1479                  | 8,1479  |         |
| mMV-GOS          | 6 |                         | 20,3163 |         |
| GOS Control      | 8 |                         |         | 43,0866 |
| Positive Control | 7 |                         |         | 46,7427 |
| Sig.             |   | 1,000                   | ,073    | ,922    |

Means for groups in homogeneous subsets are displayed.

a. Uses Harmonic Mean Sample Size = 6.583.

b. The group sizes are unequal. The harmonic mean of the group sizes is used. Type I error levels are not guaranteed.

### Propionate

Tukey HSD<sup>a,b</sup>

| SAMPLE           | N | Subset for alpha = 0.05 |        |        |
|------------------|---|-------------------------|--------|--------|
|                  |   | 1                       | 2      | 3      |
| MV Control       | 5 | 1,5679                  |        |        |
| Negative Control | 8 | 1,8621                  |        |        |
| GOS Control      | 8 |                         | 4,8514 |        |
| Positive Control | 6 |                         | 6,5056 |        |
| mMV-GOS          | 6 |                         |        | 9,4865 |
| Sig.             |   | ,994                    | ,179   | 1,000  |

Means for groups in homogeneous subsets are displayed.

a. Uses Harmonic Mean Sample Size = 6.383.

b. The group sizes are unequal. The harmonic mean of the group sizes is used. Type I error levels are not guaranteed.

### Butyrate

Tukey HSD<sup>a,b</sup>

| SAMPLE           | N | Subset for alpha = 0.05 |        |
|------------------|---|-------------------------|--------|
|                  |   | 1                       | 2      |
| MV Control       | 7 | ,8263                   |        |
| Negative Control | 8 | 1,3586                  |        |
| Positive Control | 6 | 1,8509                  |        |
| mMV-GOS          | 6 | 2,4271                  |        |
| GOS Control      | 4 |                         | 5,7880 |
| Sig.             |   | ,061                    | 1,000  |

Means for groups in homogeneous subsets are displayed.

- a. Uses Harmonic Mean Sample Size = 5.874.
- b. The group sizes are unequal. The harmonic mean of the group sizes is used. Type I error levels are not guaranteed.

### Homogeneous Subsets 24 h

#### Lactobacillus (CFU/mL)

Tukey HSD<sup>a,b</sup>

| Samples          | N  | Subset for alpha = 0.05 |                       |                       |
|------------------|----|-------------------------|-----------------------|-----------------------|
|                  |    | 1                       | 2                     | 3                     |
| MV Control       | 16 | 4,82073985782<br>3437   |                       |                       |
| Negative Control | 16 | 5,28109081491<br>4272   | 5,28109081491<br>4272 |                       |
| Positive Control | 16 | 5,97069953476<br>2247   | 5,97069953476<br>2247 | 5,97069953476<br>2247 |
| GOS Control      | 15 |                         | 6,16282289812<br>5116 | 6,16282289812<br>5116 |
| mMV-GOS          | 16 |                         |                       | 6,68394179809<br>0984 |
| Sig.             |    | ,123                    | ,353                  | ,568                  |

Means for groups in homogeneous subsets are displayed.

a. Uses Harmonic Mean Sample Size = 15.789.

b. The group sizes are unequal. The harmonic mean of the group sizes is used. Type I error levels are not guaranteed.

b. The group sizes are unequal. The harmonic mean of the group sizes is used. Type I error levels are not guaranteed.

#### Atopobium (CFU/mL)

Tukey HSD<sup>a</sup>

| Samples          | N  | Subset for alpha = 0.05 |                       |
|------------------|----|-------------------------|-----------------------|
|                  |    | 1                       | 2                     |
| MV Control       | 12 | 7,57315864805<br>9068   |                       |
| Negative Control | 12 | 8,00213666024<br>7876   | 8,00213666024<br>7876 |
| GOS Control      | 12 |                         | 8,48335569693<br>9896 |
| Positive Control | 12 |                         | 8,55722308982<br>1042 |
| mMV-GOS          | 12 |                         | 8,58192371083<br>3860 |
| Sig.             |    | ,489                    | ,197                  |

Means for groups in homogeneous subsets are displayed.

a. Uses Harmonic Mean Sample Size = 12.000.

#### All bacteria (CFU/mL)

Tukey HSD<sup>a,b</sup>

| Samples          | N  | Subset for alpha = 0.05 |                       |
|------------------|----|-------------------------|-----------------------|
|                  |    | 1                       | 2                     |
| MV Control       | 16 | 9,02812380967<br>8400   |                       |
| Negative Control | 16 | 9,19609544146<br>4099   |                       |
| Positive Control | 16 |                         | 9,48859843278<br>0973 |
| GOS Control      | 14 |                         | 9,52311818021<br>6775 |
| mMV-GOS          | 16 |                         | 9,57551822670<br>1659 |
| Sig.             |    | ,134                    | ,734                  |

Means for groups in homogeneous subsets are displayed.

a. Uses Harmonic Mean Sample Size = 15.556.

#### Bacteroides (CFU/mL)

Tukey HSD<sup>a</sup>

| Samples          | N  | Subset for alpha = 0.05 |                       |                       |
|------------------|----|-------------------------|-----------------------|-----------------------|
|                  |    | 1                       | 2                     | 3                     |
| MV Control       | 12 | 7,82574335310<br>2458   |                       |                       |
| Negative Control | 12 | 8,46536281166<br>3587   | 8,46536281166<br>3587 |                       |
| Positive Control | 12 |                         | 8,95916651173<br>0134 | 8,95916651173<br>0134 |
| GOS Control      | 12 |                         | 9,05395309125<br>5350 | 9,05395309125<br>5350 |
| mMV-GOS          | 12 |                         |                       | 9,33273244037<br>9976 |
| Sig.             |    | ,062                    | ,102                  | ,507                  |

Means for groups in homogeneous subsets are displayed.

a. Uses Harmonic Mean Sample Size = 12.000.

**Bifidobacterium (CFU/mL)**

Tukey HSD<sup>a</sup>

| Samples          | N | Subset for alpha = 0.05 |                       |
|------------------|---|-------------------------|-----------------------|
|                  |   | 1                       | 2                     |
| MV Control       | 8 | 7,37018376448<br>9815   |                       |
| Negative Control | 8 | 7,96527283015<br>5362   | 7,96527283015<br>5362 |
| GOS Control      | 8 |                         | 8,16441674734<br>9367 |
| Positive Control | 8 |                         | 8,36521429232<br>4595 |
| mMV-GOS          | 8 |                         | 8,37885294234<br>8686 |
| Sig.             |   | ,053                    | ,295                  |

Means for groups in homogeneous subsets are displayed.

a. Uses Harmonic Mean Sample Size = 8.000.

**Cocoides (CFU/mL)**

Tukey HSD<sup>a</sup>

| Samples          | N  | Subset for alpha = 0.05 |                       |                       |
|------------------|----|-------------------------|-----------------------|-----------------------|
|                  |    | 1                       | 2                     | 3                     |
| MV Control       | 12 | 4,19482913640<br>5855   |                       |                       |
| Negative Control | 12 |                         | 4,78883632193<br>4534 |                       |
| Positive Control | 12 |                         | 5,13495327545<br>1775 | 5,13495327545<br>1775 |
| GOS Control      | 12 |                         |                       | 5,36184504808<br>0892 |

|         |    |       |      |                       |
|---------|----|-------|------|-----------------------|
| mMV-GOS | 12 |       |      | 5,44072975956<br>7866 |
| Sig.    |    | 1,000 | ,355 | ,481                  |

Means for groups in homogeneous subsets are displayed.

a. Uses Harmonic Mean Sample Size = 12.000.

**Enterobacteria (CFU/mL)**

Tukey HSD<sup>a,b</sup>

| Samples          | N  | Subset for alpha = 0.05 |
|------------------|----|-------------------------|
|                  |    | 1                       |
| MV Control       | 10 | 7,56584254105<br>8049   |
| Negative Control | 12 | 7,66865623493<br>8715   |
| Positive Control | 12 | 8,00623428723<br>8632   |
| GOS Control      | 12 | 8,01799105260<br>0117   |
| mMV-GOS          | 12 | 8,02966564597<br>3198   |
| Sig.             |    | ,582                    |

Means for groups in homogeneous subsets are displayed.

a. Uses Harmonic Mean Sample Size = 11.538.

b. The group sizes are unequal. The harmonic mean of the group sizes is used. Type I error levels are not guaranteed.

**Enterococcus (CFU/mL)**

Tukey HSD<sup>a</sup>

| Samples          | N  | Subset for alpha = 0.05 |                       |                       |
|------------------|----|-------------------------|-----------------------|-----------------------|
|                  |    | 1                       | 2                     | 3                     |
| MV Control       | 12 | 6,94651346600<br>4435   |                       |                       |
| Negative Control | 12 |                         | 7,64815432241<br>0629 |                       |
| GOS Control      | 12 |                         | 7,93587642937<br>7603 | 7,93587642937<br>7603 |

|                  |    |       |               |               |
|------------------|----|-------|---------------|---------------|
| Positive Control | 12 |       | 8,01123865809 | 8,01123865809 |
|                  |    |       | 2438          | 2438          |
| mMV-GOS          | 12 |       |               | 8,32485647809 |
|                  |    |       |               | 1565          |
| Sig.             |    | 1,000 | ,326          | ,260          |

Means for groups in homogeneous subsets are displayed.

a. Uses Harmonic Mean Sample Size = 12.000.

### Acetate

Tukey HSD<sup>a,b</sup>

| SAMPLE           | N | Subset for alpha = 0.05 |         |         |         |
|------------------|---|-------------------------|---------|---------|---------|
|                  |   | 1                       | 2       | 3       | 4       |
| MV Control       | 6 | 12,2825                 |         |         |         |
| Negative Control | 8 | 12,9916                 |         |         |         |
| mMV-GOS          | 8 |                         | 30,7753 |         |         |
| Positive Control | 4 |                         |         | 43,5398 |         |
| GOS Control      | 6 |                         |         |         | 56,1108 |
| Sig.             |   | 1,000                   | 1,000   | 1,000   | 1,000   |

Means for groups in homogeneous subsets are displayed.

a. Uses Harmonic Mean Sample Size = 6.000.

b. The group sizes are unequal. The harmonic mean of the group sizes is used.

Type I error levels are not guaranteed.

### Propionate

Tukey HSD<sup>a,b</sup>

| SAMPLE           | N | Subset for alpha = 0.05 |         |
|------------------|---|-------------------------|---------|
|                  |   | 1                       | 2       |
| MV Control       | 6 | 2,4082                  |         |
| Negative Control | 8 | 2,5273                  |         |
| Positive Control | 2 | 6,7777                  |         |
| GOS Control      | 5 |                         | 13,2098 |
| mMV-GOS          | 8 |                         | 14,1886 |
| Sig.             |   | ,104                    | ,977    |

Means for groups in homogeneous subsets are displayed.

a. Uses Harmonic Mean Sample Size = 4.478.

b. The group sizes are unequal. The harmonic mean of the group sizes is used. Type I error levels are not guaranteed.

### Butyrate

Tukey HSD<sup>a,b</sup>

| SAMPLE           | N | Subset for alpha = 0.05 |        |         |
|------------------|---|-------------------------|--------|---------|
|                  |   | 1                       | 2      | 3       |
| MV Control       | 6 | 2,1276                  |        |         |
| Negative Control | 8 | 2,4511                  |        |         |
| Positive Control | 4 | 6,3121                  | 6,3121 |         |
| mMV-GOS          | 8 |                         | 7,2728 |         |
| GOS Control      | 6 |                         |        | 13,1019 |
| Sig.             |   | ,072                    | ,969   | 1,000   |

Means for groups in homogeneous subsets are displayed.

a. Uses Harmonic Mean Sample Size = 6.000.

b. The group sizes are unequal. The harmonic mean of the group sizes is used. Type I error levels are not guaranteed.
